# Supplementary material for: Computational design of two-photon active organic molecules for infrared responsive materials
Source: Royal Society of Chemistry journal article supplement (doi:10.1039/d0tc01807d), 2020-01-01
Supplement: d0tc01807d1.pdf [file d0tc01807d1.pdf]

## Electronic Supplementary Information

### Computational design of two-photon active organic molecules for infrared responsive materials

Robert Zaleśny, Md. Mehboob Alam, Paul N. Day, Kiet A. Nguyen, Ruth Pachter, Chang-Keun Lim, Paras N. Prasad, Hans Ågren

- GFSM-based analysis of two-photon absorption strengths.....**2-6**
- Summary of one- and two-photon calculations using TD-DFT..... **7-15**
- Cartesian coordinates corresponding to optimized geometries of all molecules.....**16-25**
- References.....**26**

Table S1. GFSM-based analysis for  $S_0 \rightarrow S_4$  transition for BPCSA molecule.

FINAL STATE = 4, INTERMEDIATE STATE = 1

| KL | ALPHA     | BETA      | 15xDExDK | DELTA(KL)   |
|----|-----------|-----------|----------|-------------|
| 00 | 4.7192    | 4.7192    | 0.1222   | 154.4822    |
| 40 | 6.9817    | 6.9817    | -0.1222  | -228.5471   |
| 10 | -2.2645   | -0.3039   | -0.0700  | 73.4099     |
| 04 | 6.9817    | 6.9817    | -0.1222  | -228.5471   |
| 44 | 18.0020   | 18.0020   | 0.1222   | 589.2942    |
| 14 | 77.5120   | 69.6318   | 0.0700   | 4205.6963   |
| 01 | -0.3039   | -2.2645   | -0.0700  | 73.4099     |
| 41 | 69.6318   | 77.5120   | 0.0700   | 4205.6963   |
| 11 | 1088.0888 | 1088.0888 | 0.0401   | 108618.8408 |

DELTA-2PA = 117463.74

FINAL STATE = 4, INTERMEDIATE STATE = 2

| KL | ALPHA   | BETA    | 15xDExDK | DELTA(KL) |
|----|---------|---------|----------|-----------|
| 00 | 4.7192  | 4.7192  | 0.1222   | 154.4822  |
| 40 | 6.9817  | 6.9817  | -0.1222  | -228.5471 |
| 20 | -0.0670 | -0.0283 | -0.1080  | 1.7631    |
| 04 | 6.9817  | 6.9817  | -0.1222  | -228.5471 |
| 44 | 18.0020 | 18.0020 | 0.1222   | 589.2942  |
| 24 | 0.9048  | 0.8407  | 0.1080   | 32.3112   |
| 02 | -0.0283 | -0.0670 | -0.1080  | 1.7631    |
| 42 | 0.8407  | 0.9048  | 0.1080   | 32.3112   |
| 22 | 0.1958  | 0.1958  | 0.0955   | 8.1991    |

DELTA-2PA = 363.03

FINAL STATE = 4, INTERMEDIATE STATE = 3

| KL | ALPHA   | BETA    | 15xDExDK | DELTA(KL) |
|----|---------|---------|----------|-----------|
| 00 | 4.7192  | 4.7192  | 0.1222   | 154.4822  |
| 40 | 6.9817  | 6.9817  | -0.1222  | -228.5471 |
| 30 | -0.0213 | -0.0112 | -0.1104  | 0.5887    |
| 04 | 6.9817  | 6.9817  | -0.1222  | -228.5471 |
| 44 | 18.0020 | 18.0020 | 0.1222   | 589.2942  |
| 34 | 0.0231  | 0.0078  | 0.1104   | 0.5594    |
| 03 | -0.0112 | -0.0213 | -0.1104  | 0.5887    |
| 43 | 0.0078  | 0.0231  | 0.1104   | 0.5594    |
| 33 | 0.0053  | 0.0053  | 0.0997   | 0.2112    |

DELTA-2PA = 289.19

FINAL STATE = 4, INTERMEDIATE STATE = 5

| KL | ALPHA   | BETA    | 15xDExDK | DELTA(KL) |
|----|---------|---------|----------|-----------|
| 00 | 4.7192  | 4.7192  | 0.1222   | 154.4822  |
| 40 | 6.9817  | 6.9817  | -0.1222  | -228.5471 |
| 50 | 0.0060  | 0.0068  | -0.1274  | -0.2008   |
| 04 | 6.9817  | 6.9817  | -0.1222  | -228.5471 |
| 44 | 18.0020 | 18.0020 | 0.1222   | 589.2942  |
| 54 | 0.0114  | 0.0127  | 0.1274   | 0.3785    |
| 05 | 0.0068  | 0.0060  | -0.1274  | -0.2008   |
| 45 | 0.0127  | 0.0114  | 0.1274   | 0.3785    |
| 55 | 0.0000  | 0.0000  | 0.1328   | 0.0014    |

DELTA-2PA = 287.04

Table S2. GFSM-based analysis for  $S_0 \rightarrow S_3$  transition for BMCSA molecule.

```

FINAL STATE = 3, INTERMEDIATE STATE = 1
KL      ALPHA      BETA      15xDExDK      DELTA(KL)
00      0.0007      0.0007      0.0697        0.0424
30      0.0003      0.0003     -0.0697       -0.0147
10     -0.3426     -0.3339     -0.0360       37.6290
03      0.0003      0.0003     -0.0697       -0.0147
33      0.0001      0.0001      0.0697        0.0051
13     -0.1189     -0.1159      0.0360       -13.0581
01     -0.3339     -0.3426     -0.0360       37.6290
31     -0.1159     -0.1189      0.0360       -13.0581
11     1416.8754   1416.8754    0.0185   305638.2675
DELTA-2PA =    305687.43

```

```

FINAL STATE = 3, INTERMEDIATE STATE = 2
KL      ALPHA      BETA      15xDExDK      DELTA(KL)
00      0.0007      0.0007      0.0697        0.0424
30      0.0003      0.0003     -0.0697       -0.0147
20     -0.2104     -0.2180     -0.0616       13.9184
03      0.0003      0.0003     -0.0697       -0.0147
33      0.0001      0.0001      0.0697        0.0051
23     -0.0730     -0.0757      0.0616       -4.8300
02     -0.2180     -0.2104     -0.0616       13.9184
32     -0.0757     -0.0730      0.0616       -4.8300
22     566.6363    566.6363    0.0544   41702.4484
DELTA-2PA =    41720.64

```

```

FINAL STATE = 3, INTERMEDIATE STATE = 4
KL      ALPHA      BETA      15xDExDK      DELTA(KL)
00      0.0007      0.0007      0.0697        0.0424
30      0.0003      0.0003     -0.0697       -0.0147
40     -0.0000     -0.0000     -0.0876        0.0017
03      0.0003      0.0003     -0.0697       -0.0147
33      0.0001      0.0001      0.0697        0.0051
43     -0.0000     -0.0000      0.0876       -0.0006
04     -0.0000     -0.0000     -0.0876        0.0017
34     -0.0000     -0.0000      0.0876       -0.0006
44      0.0000      0.0000      0.1100        0.0001
DELTA-2PA =          0.02

```

```

FINAL STATE = 3, INTERMEDIATE STATE = 5
KL      ALPHA      BETA      15xDExDK      DELTA(KL)
00      0.0007      0.0007      0.0697        0.0424
30      0.0003      0.0003     -0.0697       -0.0147
50     -0.0030     -0.0029     -0.0996        0.1175
03      0.0003      0.0003     -0.0697       -0.0147
33      0.0001      0.0001      0.0697        0.0051
53     -0.0010     -0.0010      0.0996       -0.0408
05     -0.0029     -0.0030     -0.0996        0.1175
35     -0.0010     -0.0010      0.0996       -0.0408
55      0.1140      0.1140      0.1422        3.2068
DELTA-2PA =          3.38

```

Table S3. GFSM-based analysis for  $S_0 \rightarrow S_4$  transition for BMCSA molecule.

```

FINAL STATE = 4, INTERMEDIATE STATE = 1
KL      ALPHA      BETA      15xDExDK      DELTA(KL)
00      0.0006      0.0006      0.0887        0.0286
40      0.0005      0.0005     -0.0887       -0.0238
10      0.2581      0.1979     -0.0305      -29.9058
04      0.0005      0.0005     -0.0887       -0.0238
44      0.0004      0.0004      0.0887        0.0197
14      0.2142      0.1643      0.0305        24.8272
01      0.1979      0.2581     -0.0305      -29.9058
41      0.1643      0.2142      0.0305        24.8272
11      723.8610    723.8610    0.0105      276313.2240
DELTA-2PA = 276303.07

```

```

FINAL STATE = 4, INTERMEDIATE STATE = 2
KL      ALPHA      BETA      15xDExDK      DELTA(KL)
00      0.0006      0.0006      0.0887        0.0286
40      0.0005      0.0005     -0.0887       -0.0238
20      -0.0003     -0.0033     -0.0594        0.1230
04      0.0005      0.0005     -0.0887       -0.0238
44      0.0004      0.0004      0.0887        0.0197
24      -0.0003     -0.0028      0.0594       -0.1021
02      -0.0033     -0.0003     -0.0594        0.1230
42      -0.0028     -0.0003      0.0594       -0.1021
22      0.0407      0.0407      0.0397        4.0971
DELTA-2PA = 4.14

```

```

FINAL STATE = 4, INTERMEDIATE STATE = 3
KL      ALPHA      BETA      15xDExDK      DELTA(KL)
00      0.0006      0.0006      0.0887        0.0286
40      0.0005      0.0005     -0.0887       -0.0238
30      -0.0000     -0.0000     -0.0686        0.0022
04      0.0005      0.0005     -0.0887       -0.0238
44      0.0004      0.0004      0.0887        0.0197
34      -0.0000     -0.0000      0.0686       -0.0018
03      -0.0000     -0.0000     -0.0686        0.0022
43      -0.0000     -0.0000      0.0686       -0.0018
33      0.0000      0.0000      0.0530        0.0002
DELTA-2PA = 0.00

```

```

FINAL STATE = 4, INTERMEDIATE STATE = 5
KL      ALPHA      BETA      15xDExDK      DELTA(KL)
00      0.0006      0.0006      0.0887        0.0286
40      0.0005      0.0005     -0.0887       -0.0238
50      0.0047      0.0036     -0.1023       -0.1625
04      0.0005      0.0005     -0.0887       -0.0238
44      0.0004      0.0004      0.0887        0.0197
54      0.0039      0.0030      0.1023        0.1349
05      0.0036      0.0047     -0.1023       -0.1625
45      0.0030      0.0039      0.1023        0.1349
55      0.3233      0.3233      0.1178       10.9750
DELTA-2PA = 10.92

```

Table S4. GFSM-based analysis for  $S_0 \rightarrow S_2$  transition for BPyMCSA molecule.

| FINAL STATE = 2, INTERMEDIATE STATE = 1 |           |           |          |             |
|-----------------------------------------|-----------|-----------|----------|-------------|
| KL                                      | ALPHA     | BETA      | 15xDExDK | DELTA(KL)   |
| 00                                      | 0.0000    | 0.0000    | 0.0452   | 0.0010      |
| 20                                      | 0.0000    | 0.0000    | -0.0452  | -0.0009     |
| 10                                      | -0.0709   | -0.0649   | -0.0266  | 10.2047     |
| 02                                      | 0.0000    | 0.0000    | -0.0452  | -0.0009     |
| 22                                      | 0.0000    | 0.0000    | 0.0452   | 0.0008      |
| 12                                      | -0.0643   | -0.0588   | 0.0266   | -9.2542     |
| 01                                      | -0.0649   | -0.0709   | -0.0266  | 10.2047     |
| 21                                      | -0.0588   | -0.0643   | 0.0266   | -9.2542     |
| 11                                      | 3862.1792 | 3862.1792 | 0.0157   | 985409.0398 |
| DELTA-2PA =                             |           | 985410.94 |          |             |

| FINAL STATE = 2, INTERMEDIATE STATE = 3 |         |         |          |           |
|-----------------------------------------|---------|---------|----------|-----------|
| KL                                      | ALPHA   | BETA    | 15xDExDK | DELTA(KL) |
| 00                                      | 0.0000  | 0.0000  | 0.0452   | 0.0010    |
| 20                                      | 0.0000  | 0.0000  | -0.0452  | -0.0009   |
| 30                                      | -0.0013 | -0.0018 | -0.0485  | 0.1268    |
| 02                                      | 0.0000  | 0.0000  | -0.0452  | -0.0009   |
| 22                                      | 0.0000  | 0.0000  | 0.0452   | 0.0008    |
| 32                                      | -0.0011 | -0.0016 | 0.0485   | -0.1150   |
| 03                                      | -0.0018 | -0.0013 | -0.0485  | 0.1268    |
| 23                                      | -0.0016 | -0.0011 | 0.0485   | -0.1150   |
| 33                                      | 1.9393  | 1.9393  | 0.0520   | 149.1723  |
| DELTA-2PA =                             |         | 149.20  |          |           |

| FINAL STATE = 2, INTERMEDIATE STATE = 4 |        |        |          |           |
|-----------------------------------------|--------|--------|----------|-----------|
| KL                                      | ALPHA  | BETA   | 15xDExDK | DELTA(KL) |
| 00                                      | 0.0000 | 0.0000 | 0.0452   | 0.0010    |
| 20                                      | 0.0000 | 0.0000 | -0.0452  | -0.0009   |
| 40                                      | 0.0000 | 0.0000 | -0.0496  | -0.0000   |
| 02                                      | 0.0000 | 0.0000 | -0.0452  | -0.0009   |
| 22                                      | 0.0000 | 0.0000 | 0.0452   | 0.0008    |
| 42                                      | 0.0000 | 0.0000 | 0.0496   | 0.0000    |
| 04                                      | 0.0000 | 0.0000 | -0.0496  | -0.0000   |
| 24                                      | 0.0000 | 0.0000 | 0.0496   | 0.0000    |
| 44                                      | 0.0000 | 0.0000 | 0.0544   | 0.0000    |
| DELTA-2PA =                             |        | 0.00   |          |           |

| FINAL STATE = 2, INTERMEDIATE STATE = 5 |        |        |          |           |
|-----------------------------------------|--------|--------|----------|-----------|
| KL                                      | ALPHA  | BETA   | 15xDExDK | DELTA(KL) |
| 00                                      | 0.0000 | 0.0000 | 0.0452   | 0.0010    |
| 20                                      | 0.0000 | 0.0000 | -0.0452  | -0.0009   |
| 50                                      | 0.0000 | 0.0000 | -0.0570  | -0.0001   |
| 02                                      | 0.0000 | 0.0000 | -0.0452  | -0.0009   |
| 22                                      | 0.0000 | 0.0000 | 0.0452   | 0.0008    |
| 52                                      | 0.0000 | 0.0000 | 0.0570   | 0.0001    |
| 05                                      | 0.0000 | 0.0000 | -0.0570  | -0.0001   |
| 25                                      | 0.0000 | 0.0000 | 0.0570   | 0.0001    |
| 55                                      | 0.0000 | 0.0000 | 0.0718   | 0.0000    |
| DELTA-2PA =                             |        | 0.00   |          |           |

Table S5. GFSM-based analysis for  $S_0 \rightarrow S_4$  transition for BPyMCSA molecule.

```

FINAL STATE = 4, INTERMEDIATE STATE = 1
KL      ALPHA      BETA      15xDExDK      DELTA(KL)
00      0.0000      0.0000      0.0497         0.0003
40      0.0000      0.0000     -0.0497        -0.0004
10      0.0275      0.0138     -0.0256        -3.2226
04      0.0000      0.0000     -0.0497        -0.0004
44      0.0000      0.0000      0.0497         0.0004
14      0.0297      0.0149      0.0256         3.4828
01      0.0138      0.0275     -0.0256        -3.2226
41      0.0149      0.0297      0.0256         3.4828
11      839.4590     839.4590     0.0132    254167.4534
DELTA-2PA =    254167.97

```

```

FINAL STATE = 4, INTERMEDIATE STATE = 2
KL      ALPHA      BETA      15xDExDK      DELTA(KL)
00      0.0000      0.0000      0.0497         0.0003
40      0.0000      0.0000     -0.0497        -0.0004
20      0.0000      0.0000     -0.0451        -0.0000
04      0.0000      0.0000     -0.0497        -0.0004
44      0.0000      0.0000      0.0497         0.0004
24      0.0000      0.0000      0.0451         0.0000
02      0.0000      0.0000     -0.0451        -0.0000
42      0.0000      0.0000      0.0451         0.0000
22      0.0000      0.0000      0.0409         0.0000
DELTA-2PA =          0.00

```

```

FINAL STATE = 4, INTERMEDIATE STATE = 3
KL      ALPHA      BETA      15xDExDK      DELTA(KL)
00      0.0000      0.0000      0.0497         0.0003
40      0.0000      0.0000     -0.0497        -0.0004
30     -0.0019     -0.0016     -0.0485         0.1444
04      0.0000      0.0000     -0.0497        -0.0004
44      0.0000      0.0000      0.0497         0.0004
34     -0.0021     -0.0017      0.0485        -0.1561
03     -0.0016     -0.0019     -0.0485         0.1444
43     -0.0017     -0.0021      0.0485        -0.1561
33      6.7693      6.7693      0.0474    570.9623
DELTA-2PA =    570.94

```

```

FINAL STATE = 4, INTERMEDIATE STATE = 5
KL      ALPHA      BETA      15xDExDK      DELTA(KL)
00      0.0000      0.0000      0.0497         0.0003
40      0.0000      0.0000     -0.0497        -0.0004
50     -0.0000     -0.0000     -0.0574         0.0001
04      0.0000      0.0000     -0.0497        -0.0004
44      0.0000      0.0000      0.0497         0.0004
54     -0.0000     -0.0000      0.0574        -0.0001
05     -0.0000     -0.0000     -0.0574         0.0001
45     -0.0000     -0.0000      0.0574        -0.0001
55      0.0000      0.0000      0.0664         0.0000
DELTA-2PA =          0.00

```

The 1PA results are listed in Table S6. In addition to the excitation energies and oscillator strengths, the calculated charge-transfer (CT) diagnostic,  $D_{CT}$ , of LeBahers, Adamo, and Ciofini,<sup>1</sup> is included for each excited state. For each of the four molecules, the first excited-state has a large oscillator strength, although only for NCSA does it appear to be a CT state. For NCSA,  $D_{CT}$  for the transition to  $S_1$  is 5.86 when PBE0 is used and 3.53 with the CAM-B3LYP functional, while  $D_{CT}$  is less than 1.0 for the BPSCA molecule and less than 0.1 for BMCSA and BPyMCSA. When the CAM-B3LYP functional is used, the energy of the first excited-state is in good agreement with the CC2 results, significantly better than for PBE0. For the first excited state of each of the four molecules, the average error of the CAM-B3LYP results relative to the CC2 values is only 0.07 eV, while for PBE0 the average error is 0.32 eV. For the higher-energy excited states, the CAM-B3LYP results are also in better agreement with CC2 than with PBE0. When the average errors are calculated, by and large, the CC2 excitation energies listed in Table S6, the CAM-B3LYP error is 0.16 eV, while the PBE0 error is 0.39 eV. Our CAM-B3LYP results for BPyMCSA, are consistent with those in Table 3 in the manuscript.

Table S7 lists the corresponding results with inclusion of the DMSO solvent using PCM, in comparison to the measured absorption for BPCSA that was characterized experimentally. In the gas-phase calculations, the energy of the first excited-state using CAM-B3LYP was in excellent agreement with the CC2 value, while the PBE0 value is fairly close to the value measured in DMSO. When the effects of the DMSO solvent were included, the calculated values were red-shifted such that PBE0 underestimates the excitation energy by 0.25 eV, while CAM-B3LYP overestimates it by 0.14 eV. A modified CAM-B3LYP, denoted mCAM-B3LYP,<sup>2-4</sup> which has been previously tested in cases where less range separation is needed to model charge transfer,

results in slightly better agreement, underestimating the excitation energy by 0.13 eV. The good agreement with the measurement for this functional can be seen in Figure S1.

Table S8 lists measured and calculated emission energies. The first triplet-spin state of BPCSA was optimized to obtain the adiabatic phosphorescence energy, but the calculated values are significantly lower than the measured emission energies of 2.65 eV and 2.76 eV. However, the CAM-B3LYP vertical fluorescence energy is in good agreement with experiment. The CAM-B3LYP adiabatic fluorescence and phosphorescence are in good agreement with the XMC-QDPT2 values. However, the agreement is not as good for the other three molecules. While for BPCSA the CAM-B3LYP functional is in good agreement with QDPT2 for the emission energy from  $S_1$  state, it yields a significantly lower value than QDPT2 for the emission energy from  $T_1$  state. For BPyMCSA and NCSA, the  $T_1$  emission energies calculated with PBE0 and CAM-B3LYP are lower than those reported for QDPT2. For BPyMCSA, the  $S_1$  emission energies calculated with TDDFT are significantly larger than the QDPT2 value. For NCSA, PBE0 is in good agreement with QDPT2 for  $S_1$ , but underestimates the  $T_1$  energy. Optimization of the  $S_1$  state with CAM-B3LYP proved to be problematic.

The calculated 2PA spectra are listed in Table S9. The 2PA transition strengths and cross sections are reported for each final state. We note that the 2PA spectra are not consistent across the three levels of theory. The CAM-B3LYP values do show some correlation with the CC2 values; for example, a large 2PA cross-sections for  $n = 4$  in BPCSA and for  $n = 3$  and 4 in BMSCA. In Figure S2, the 2PA spectra are plotted based on the calculations with the PBE0 and CAM-B3LYP functionals. Not only is the CAMB3LYP spectrum blue-shifted compared to the PBE0 spectrum, but the first peak is the most intense with PBE0, while with CAMB3LYP, the second peak is



dominant. The calculated 2PA cross-section is sensitive to state-energies (Table S9), which can result in quite different 2PA spectra.

Table S6. Calculated 1PA for the four compounds. Both functionals were corrected with the D3 dispersion correction during optimization. The CC2 results are from this work, using the cc-pVDZ basis set. The transition energies are listed under “eV” (in eV), and the O.S. denotes oscillator strengths.  $D_{CT}^1$  is in Å.

| CC2     |      | PBE0 |      |          | CAM-B3LYP |      |          |
|---------|------|------|------|----------|-----------|------|----------|
| eV      | O.S. | eV   | O.S. | $D_{CT}$ | eV        | O.S. | $D_{CT}$ |
| BPCSA   |      |      |      |          |           |      |          |
| 3.86    | 1.63 | 3.48 | 1.34 | 0.92     | 3.85      | 1.39 | 0.58     |
| 4.62    | 0.02 | 4.28 | 0.04 | 2.68     | 4.85      | 0.01 | 0.80     |
| 4.67    | 0.01 | 4.47 | 0.01 | 2.36     | 4.89      | 0.01 | 1.40     |
| 4.91    | 0.07 | 4.49 | 0.00 | 10.22    | 5.01      | 0.09 | 1.54     |
| 5.02    | 0.00 | 4.52 | 0.01 | 2.34     | 5.25      | 0.00 | 1.11     |
| BMCSA   |      |      |      |          |           |      |          |
| 2.81    | 1.43 | 2.49 | 1.50 | 0.06     | 2.96      | 1.48 | 0.09     |
| 3.49    | 0.62 | 3.08 | 0.00 | 0.10     | 3.76      | 0.24 | 0.20     |
| 3.71    | 0.00 | 3.15 | 0.12 | 0.12     | 3.88      | 0.00 | 0.10     |
| 4.19    | 0.00 | 3.71 | 0.00 | 0.02     | 4.44      | 0.00 | 0.07     |
| 4.50    | 0.05 | 4.09 | 0.13 | 0.03     | 4.67      | 0.06 | 0.07     |
| NCSA    |      |      |      |          |           |      |          |
| 3.76    | 1.33 | 3.35 | 1.02 | 5.86     | 3.78      | 1.18 | 3.53     |
| 4.01    | 0.00 | 3.94 | 0.00 | 1.62     | 4.06      | 0.00 | 0.97     |
| 4.58    | 0.00 | 3.97 | 0.00 | 11.82    | 4.53      | 0.00 | 0.86     |
| 4.61    | 0.01 | 4.19 | 0.15 | 5.31     | 4.80      | 0.02 | 2.15     |
| 4.69    | 0.00 | 4.39 | 0.00 | 4.63     | 4.82      | 0.00 | 2.32     |
| BPyMCSA |      |      |      |          |           |      |          |
| 2.37    | 3.17 | 2.20 | 2.47 | 0.02     | 2.47      | 2.73 | 0.02     |
| 2.99    | 0.00 | 2.51 | 0.00 | 1.30     | 3.24      | 0.00 | 1.12     |
| 3.10    | 0.01 | 2.55 | 0.00 | 0.96     | 3.27      | 0.01 | 0.92     |
| 3.13    | 0.00 | 2.67 | 0.00 | 0.19     | 3.43      | 0.00 | 0.05     |
| 3.38    | 0.00 | 3.13 | 0.00 | 0.01     | 3.61      | 0.00 | 0.01     |

Table S7. The effect of solvent on 1PA of BPCSA molecule in comparison to experiment. Measured values include absorption spectra in DMSO and excitation spectra dispersed in water and pure powder. Both functionals were corrected with the D3 dispersion correction during optimization. The standard CAM-B3LYP, with  $\alpha = 0.19$  and  $\beta = 0.46$ , is denoted “CAM-B3LYP”, while “mCAM-B3LYP” refers to the modified CAM-B3LYP with  $\alpha = 0.19$  and  $\beta = 0.19$ .

| <b>CC2 (gas)</b>     |                 | <b>PBE0 (gas)</b>        |      |                 | <b>CAM-B3LYP (gas)</b>  |      |                 |
|----------------------|-----------------|--------------------------|------|-----------------|-------------------------|------|-----------------|
| eV                   | O.S.            | eV                       | O.S. | D <sub>CT</sub> | eV                      | O.S. | D <sub>CT</sub> |
| 3.86                 | 1.63            | 3.48                     | 1.34 | 0.92            | 3.85                    | 1.39 | 0.58            |
| 4.62                 | 0.02            | 4.28                     | 0.04 | 2.68            | 4.85                    | 0.01 | 0.80            |
| 4.67                 | 0.01            | 4.47                     | 0.01 | 2.36            | 4.89                    | 0.01 | 1.40            |
| 4.91                 | 0.07            | 4.49                     | 0.00 | 10.22           | 5.01                    | 0.09 | 1.54            |
| 5.02                 | 0.00            | 4.52                     | 0.01 | 2.34            | 5.25                    | 0.00 | 1.11            |
| <b>eV (measured)</b> |                 | <b>PBE0 (DMSO)</b>       |      |                 | <b>CAM-B3LYP (DMSO)</b> |      |                 |
|                      |                 | eV                       | O.S. | D <sub>CT</sub> | eV                      | O.S. | D <sub>CT</sub> |
| 3.56                 | absorp. (DMSO)  | 3.32                     | 1.45 | 0.69            | 3.70                    | 1.48 | 0.67            |
| 3.28                 | excit. (water)  | 4.19                     | 0.02 | 2.88            | 4.82                    | 0.04 | 0.51            |
| 2.85                 | excit. (powder) | 4.25                     | 0.01 | 7.89            | 4.89                    | 0.00 | 1.57            |
|                      |                 | 4.45                     | 0.02 | 2.58            | 4.91                    | 0.11 | 0.88            |
|                      |                 | 4.49                     | 0.01 | 2.53            | 5.24                    | 0.00 | 1.59            |
|                      |                 | <b>mCAM-B3LYP (DMSO)</b> |      |                 |                         |      |                 |
|                      |                 | eV                       | O.S. | D <sub>CT</sub> | eV                      | O.S. | D <sub>CT</sub> |
|                      |                 | 3.43                     | 1.45 | 0.50            |                         |      |                 |
|                      |                 | 4.42                     | 0.03 | 3.21            |                         |      |                 |
|                      |                 | 4.56                     | 0.01 | 0.89            |                         |      |                 |
|                      |                 | 4.57                     | 0.01 | 1.36            |                         |      |                 |
|                      |                 | 4.78                     | 0.20 | 4.91            |                         |      |                 |

Table S8. Emission for molecules in gas-phase. Adiabatic transition energies corrected for zero-point vibrational energy ( $\Delta H$ ) as well as vertical transition energies evaluated at the optimized excited-state geometry. In some cases, the  $S_0$  energy at the  $T_1$  optimized geometry was higher than the  $T_1$  energy, and thus the formal calculation of a vertical emission energy resulted in a negative value (in red, see parentheses). Measured emission energy for BPCSA is 2.76 and 2.65 eV in water and powder, respectively. <sup>a)</sup> DMSO

|                                 | <b>QDPT2</b> | <b>PBE0</b> | <b>CAM-B3LYP</b>           |
|---------------------------------|--------------|-------------|----------------------------|
| <b>BPCSA</b>                    |              |             |                            |
| $\Delta H(S_0 \rightarrow T_1)$ | 1.60         | 1.51        | 1.55 (1.54 <sup>a)</sup> ) |
| $\Delta H(S_0 \rightarrow S_1)$ | 3.40         | 3.11        | 3.35                       |
| vert.( $T_1 \rightarrow S_0$ )  |              | (0.42)      | (0.70)                     |
| vert.( $S_1 \rightarrow S_0$ )  |              | 2.89        | 2.74                       |
| <b>BMCSA</b>                    |              |             |                            |
| $\Delta H(S_0 \rightarrow T_1)$ | 1.60         | 1.23        | 1.38                       |
| $\Delta H(S_0 \rightarrow S_1)$ | 2.70         | 2.30        | 2.63                       |
| vert.( $T_1 \rightarrow S_0$ )  |              | 0.96        | 0.87                       |
| vert.( $S_1 \rightarrow S_0$ )  |              | 2.24        | 2.46                       |
| <b>NCSA</b>                     |              |             |                            |
| $\Delta H(S_0 \rightarrow T_1)$ | 2.60         | 1.55        | 1.59                       |
| $\Delta H(S_0 \rightarrow S_1)$ | 3.00         | 3.11        |                            |
| vert.( $T_1 \rightarrow S_0$ )  |              | (0.29)      | (0.59)                     |
| vert.( $S_1 \rightarrow S_0$ )  |              | 3.05        |                            |
| <b>BPyMCSA</b>                  |              |             |                            |
| $\Delta H(S_0 \rightarrow T_1)$ | 0.86         | 0.50        | 0.36                       |
| $\Delta H(S_0 \rightarrow S_1)$ | 1.47         | 2.00        | 2.20                       |
| vert.( $T_1 \rightarrow S_0$ )  |              | 0.31        | (0.09)                     |
| vert.( $S_1 \rightarrow S_0$ )  |              | 2.03        | 2.11                       |

Table S9. Calculated two-photon absorption spectra. Both functionals were corrected with the D3 dispersion correction during optimization. The 2PA transition strengths (TPS-TS), and 2PA cross-sections, calculated using a Gaussian line-width function with a width of 0.2 eV, listed under the heading “GM”.

| CC2            |        |         | PBE0 (gas) |        |         | CAM-B3LYP (gas) |        |         |
|----------------|--------|---------|------------|--------|---------|-----------------|--------|---------|
| eV             | 2PA-TS | GM      | eV         | 2PA-TS | GM      | eV              | 2PA-TS | GM      |
| <b>BPCSA</b>   |        |         |            |        |         |                 |        |         |
| 3.86           | 4600   | 37.06   | 3.48       | 125    | 0.82    | 3.85            | 530    | 4.25    |
| 4.62           | 1000   | 11.54   | 4.28       | 103367 | 1025.10 | 4.85            | 1561   | 19.85   |
| 4.67           | 2700   | 31.84   | 4.47       | 144    | 1.56    | 4.89            | 741    | 9.60    |
| 4.91           | 97900  | 1276.07 | 4.49       | 615    | 6.71    | 5.01            | 28630  | 388.93  |
| 5.02           | 100    | 1.36    | 4.52       | 2681   | 29.57   | 5.25            | 76     | 1.14    |
| <b>BMCSA</b>   |        |         |            |        |         |                 |        |         |
| 2.81           | 50     | 0.21    | 2.49       | 11     | 0.04    | 2.96            | 13     | 0.06    |
| 3.49           | 50     | 0.33    | 3.08       | 370000 | 1895.00 | 3.76            | 18     | 0.14    |
| 3.71           | 491700 | 3659.12 | 3.15       | 28     | 0.15    | 3.88            | 170100 | 1383.05 |
| 4.19           | 264000 | 2505.88 | 3.71       | 16923  | 125.70  | 4.44            | 353667 | 3770.54 |
| 4.50           | 50     | 0.55    | 4.09       | 86     | 0.78    | 4.67            | 116    | 1.37    |
| <b>NCSA</b>    |        |         |            |        |         |                 |        |         |
| 3.76           | 25600  | 195.68  | 3.35       | 25563  | 154.90  | 3.78            | 10517  | 81.06   |
| 4.01           | 50     | 0.43    | 3.94       | 2      | 0.02    | 4.06            | 7      | 0.07    |
| 4.58           | 50     | 0.57    | 3.97       | 842    | 7.18    | 4.53            | 1      | 0.01    |
| 4.61           | 300    | 3.45    | 4.19       | 30513  | 289.90  | 4.80            | 1898   | 23.65   |
| 4.69           | 1100   | 13.08   | 4.39       | 586    | 6.10    | 4.82            | 145    | 1.82    |
| <b>BPyMCSA</b> |        |         |            |        |         |                 |        |         |
| 2.37           | 0      | 0.00    | 2.20       | 3      | 0.01    | 2.47            | 0      | 0.00    |
| 2.99           | 858600 | 4150.13 | 2.51       | 37933  | 129.70  | 3.24            | 110567 | 627.00  |
| 3.10           | 0      | 0.00    | 2.55       | 468    | 1.64    | 3.27            | 1726   | 9.96    |
| 3.13           | 214200 | 1134.58 | 2.67       | 86533  | 334.80  | 3.43            | 368000 | 2343.00 |
| 3.38           | 2700   | 16.68   | 3.13       | 4873   | 25.75   | 3.61            | 131267 | 927.10  |

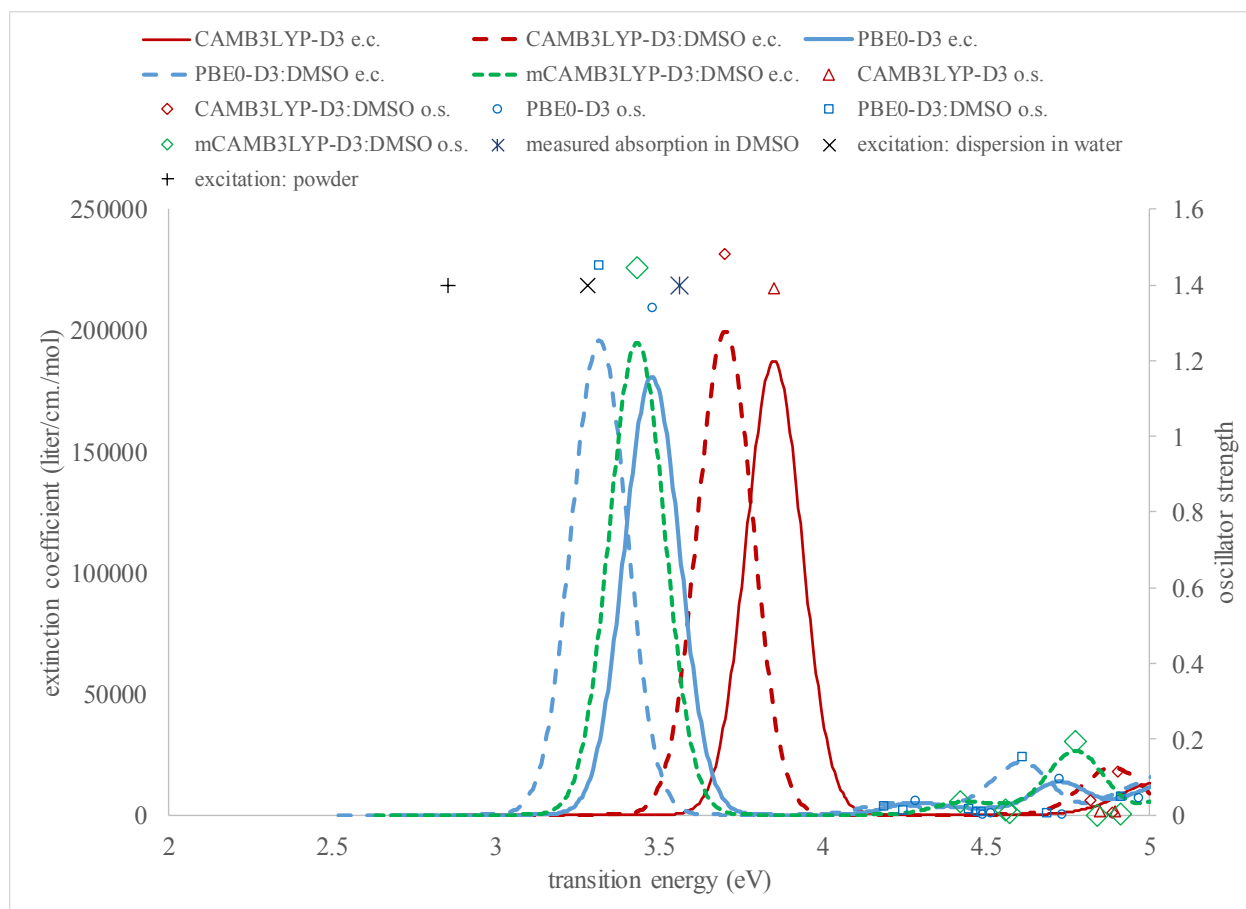

Figure S1. 1PA of BPCSA with several functionals with and without solvent effects, in comparison to experiment.

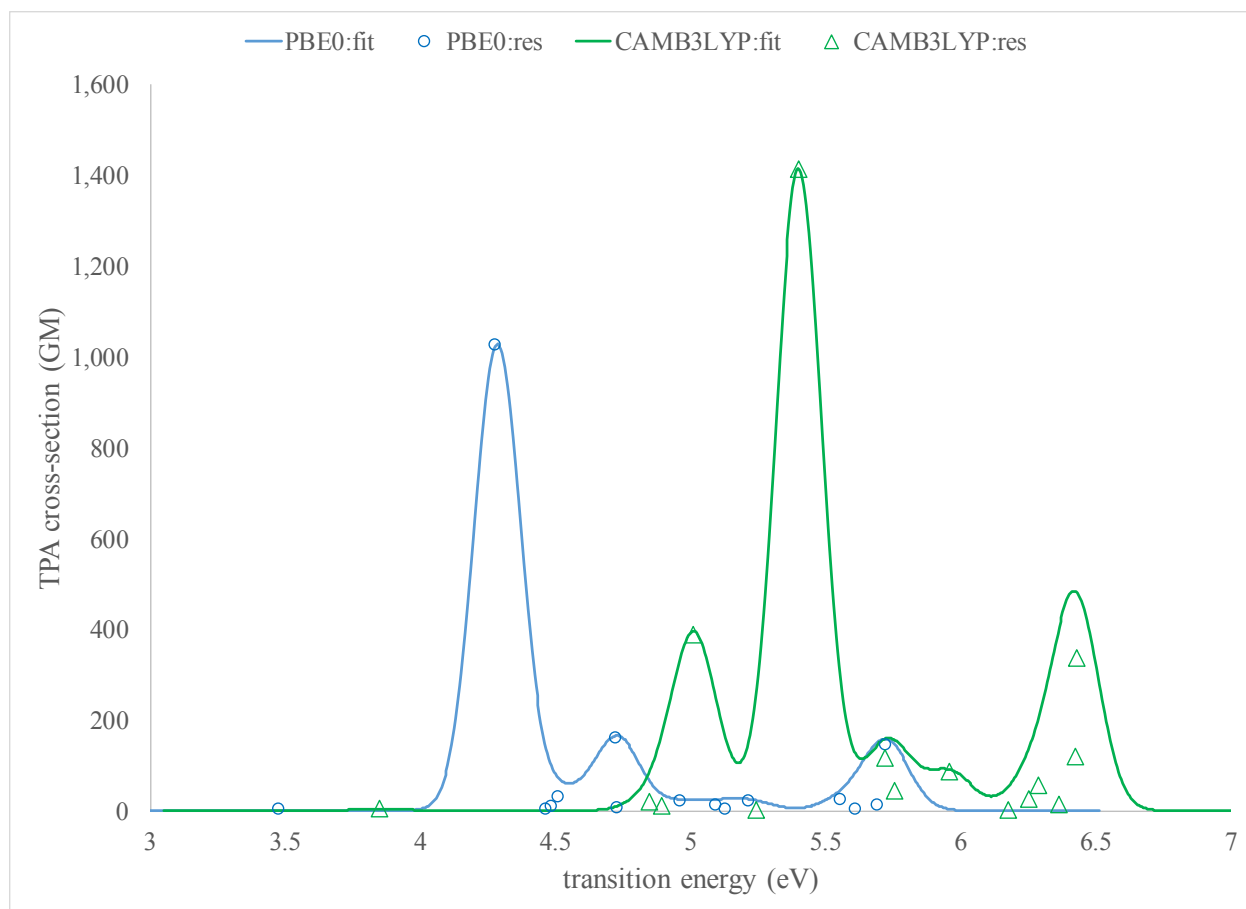

Figure S2. Calculated 2PA cross-section for BPCSA using quadratic response TDDFT and the two functionals indicated. The label “res” indicates the two-photon resonances, while “fit” indicates a fit to a Gaussian form with linewidth 0.2 eV.

BPCSA (geometry optimized at B3LYP/cc-pVDZ level of theory)

|   |                |               |               |
|---|----------------|---------------|---------------|
| C | 6.3249585439   | -0.4951189009 | -0.0605218785 |
| C | 7.1629579657   | 0.0098477757  | -1.0729976705 |
| C | 8.5116769500   | -0.3455409286 | -1.1333190200 |
| C | 9.0553595961   | -1.2140144594 | -0.1821240006 |
| C | 8.2363296957   | -1.7234393899 | 0.8299354543  |
| C | 6.8874406338   | -1.3684873516 | 0.8898107127  |
| H | 6.7456898814   | 0.6687919023  | -1.8373448904 |
| H | 9.1397373257   | 0.0526939523  | -1.9336883380 |
| H | 10.1106982897  | -1.4916698418 | -0.2289655508 |
| H | 8.6519217170   | -2.3954986387 | 1.5844597428  |
| H | 6.2662066970   | -1.7525735588 | 1.7016833696  |
| C | 4.8898526500   | -0.1168283684 | 0.0014584954  |
| C | 4.4610598851   | 1.1844512919  | -0.3164702726 |
| C | 3.1154370690   | 1.5401732196  | -0.2573860072 |
| C | 2.1297678837   | 0.6063490867  | 0.1140921852  |
| C | 2.5593047829   | -0.6915519200 | 0.4524333789  |
| C | 3.9045966145   | -1.0439018670 | 0.3917491568  |
| H | 5.1967899264   | 1.9426918120  | -0.5917925064 |
| H | 2.8226387726   | 2.5628027448  | -0.5024458907 |
| C | 0.6928764453   | 0.9916931111  | 0.1468482133  |
| H | 1.8363702730   | -1.4376905595 | 0.7867732897  |
| H | 4.1958592386   | -2.0658824569 | 0.6426823411  |
| C | -0.3206345004  | 0.0824762758  | 0.0226125426  |
| C | 0.4358088884   | 2.3969670102  | 0.2912523771  |
| N | 0.2686980554   | 3.5455578252  | 0.4030537176  |
| C | -1.7707993427  | 0.2159877612  | 0.0482545747  |
| C | -2.5280402101  | -0.9507219307 | -0.1878456800 |
| C | -3.9217339920  | -0.9509085397 | -0.1899845513 |
| C | -4.6108829448  | 0.2475435926  | 0.0534409593  |
| C | -3.8760091916  | 1.4245655835  | 0.2956726700  |
| C | -2.4909274882  | 1.4126847826  | 0.2938160634  |
| H | -2.0047806504  | -1.8916124526 | -0.3775685786 |
| H | -4.4556400415  | -1.8811834757 | -0.3796594933 |
| O | -5.9605120822  | 0.3778549016  | 0.0792259688  |
| H | -4.4281579004  | 2.3465001999  | 0.4853142362  |
| H | -1.9628557075  | 2.3444855852  | 0.4864410365  |
| H | 0.0096001378   | -0.9464854226 | -0.1442638917 |
| C | -6.7764549744  | -0.7728010110 | -0.1563460425 |
| C | -8.2280751662  | -0.3296695668 | -0.0752728076 |
| C | -9.2112536678  | -1.4847593114 | -0.2693791837 |
| N | -10.5870247204 | -0.9810438536 | -0.2498257127 |
| H | -11.2363699793 | -1.7520101226 | -0.4186412775 |
| H | -10.8105770618 | -0.6451746758 | 0.6908648575  |
| H | -6.5476677474  | -1.1957345618 | -1.1525539025 |
| H | -6.5538931468  | -1.5486033512 | 0.6003115610  |
| H | -8.4231258644  | 0.4432766738  | -0.8358485810 |
| H | -8.3948941543  | 0.1424671710  | 0.9094843095  |
| H | -9.0390759137  | -1.9495335071 | -1.2569084158 |
| H | -9.0017873357  | -2.2744700638 | 0.4868847881  |



NCSA (geometry optimized at B3LYP/cc-pVDZ level of theory)

|   |                |               |               |
|---|----------------|---------------|---------------|
| C | -1.4467442207  | 1.3701463327  | 0.2102795192  |
| C | -0.7891401935  | 0.1250916876  | 0.0347334958  |
| C | -1.6043129054  | -1.0160054331 | -0.1285338043 |
| C | -2.9950414587  | -0.9468978369 | -0.1261109649 |
| C | -3.6222741166  | 0.2980876295  | 0.0473205839  |
| C | -2.8283871506  | 1.4507642265  | 0.2161718392  |
| C | 0.6489728240   | -0.0823033629 | 0.0132449518  |
| C | 1.7083594534   | 0.7821652992  | 0.0795471323  |
| C | 1.5246560345   | 2.2039364778  | 0.1432673510  |
| N | 1.4176498724   | 3.3639792221  | 0.1898054148  |
| O | -4.9602195080  | 0.4965987339  | 0.0696196799  |
| C | -5.8383823212  | -0.6229803168 | -0.0945727620 |
| C | -7.2636901816  | -0.0992605555 | -0.0360206779 |
| C | -8.3072698696  | -1.2106045314 | -0.1591834901 |
| N | -9.6537228113  | -0.6338175168 | -0.1672713971 |
| C | 3.1213245094   | 0.3206190775  | 0.0550281777  |
| C | 4.1490569011   | 1.1996035510  | -0.3460702238 |
| C | 5.4760573837   | 0.7820995384  | -0.3982065078 |
| C | 5.7864292901   | -0.5285953334 | -0.0376552595 |
| C | 4.7992741329   | -1.4214620545 | 0.3830127008  |
| C | 3.4777308273   | -0.9917924112 | 0.4328848060  |
| H | 6.2734987590   | 1.4524942973  | -0.7150131821 |
| H | 3.9019827331   | 2.2241425540  | -0.6277452348 |
| H | 2.7181021007   | -1.6834308358 | 0.7985254318  |
| H | 5.0841576845   | -2.4302884737 | 0.6776047667  |
| H | -1.1292049423  | -1.9912574527 | -0.2630305267 |
| H | -3.5762473888  | -1.8585044275 | -0.2576143477 |
| H | -3.3338134646  | 2.4081835245  | 0.3518259372  |
| H | -0.8718691763  | 2.2842241862  | 0.3447473210  |
| H | 0.9248378677   | -1.1345720852 | -0.0956058027 |
| H | -10.3439273244 | -1.3762770783 | -0.2967547004 |
| H | -9.8578919737  | -0.2369763825 | 0.7538195938  |
| H | -5.6366191159  | -1.1144492962 | -1.0644565334 |
| H | -5.6507958792  | -1.3615394559 | 0.7070016244  |
| H | -7.4222427337  | 0.6363760040  | -0.8407269598 |
| H | -7.3999135192  | 0.4381868457  | 0.9194458006  |
| H | -8.1646778313  | -1.7412738632 | -1.1177501290 |
| H | -8.1357680336  | -1.9641622195 | 0.6421815331  |
| N | 7.1892521463   | -0.9794028910 | -0.0886938916 |
| O | 8.0322458367   | -0.1687029146 | -0.4563883494 |
| O | 7.4240266960   | -2.1381282539 | 0.2382490854  |

BMCSA (geometry optimized at B3LYP/cc-pVDZ level of theory)

|   |               |                |               |
|---|---------------|----------------|---------------|
| C | -0.8098831147 | -6.3860467612  | 0.4905229471  |
| C | -0.0060847321 | -5.3391825231  | -0.0038841157 |
| C | 1.2377149678  | -5.6968623959  | -0.5643468680 |
| C | 1.6647433924  | -7.0179512389  | -0.6061229269 |
| C | 0.8609644585  | -8.0569230105  | -0.0926550492 |
| C | -0.3898692214 | -7.7112563600  | 0.4531240208  |
| C | -0.4602002441 | -3.9287797802  | 0.0687777833  |
| C | -1.8695132344 | -3.7527283220  | 0.2898982068  |
| N | -3.0162452033 | -3.6480536882  | 0.4761805439  |
| N | 1.2612736621  | -9.3849214261  | -0.1907367037 |
| C | 0.3898692214  | -2.8594949864  | -0.0420265060 |
| C | 0.1517472914  | -1.4264077288  | -0.0406694008 |
| C | -1.1229136497 | -0.8210103726  | -0.0483197340 |
| C | -1.2861284172 | 0.5609356012   | -0.0442843659 |
| C | -0.1517472914 | 1.4264077288   | -0.0406694008 |
| C | 1.1229136497  | 0.8210103726   | -0.0483197340 |
| C | 1.2861284172  | -0.5609356012  | -0.0442843659 |
| C | -0.3898692214 | 2.8594949864   | -0.0420265060 |
| C | 0.4602002441  | 3.9287797802   | 0.0687777833  |
| C | 1.8695132344  | 3.7527283220   | 0.2898982068  |
| N | 3.0162452033  | 3.6480536882   | 0.4761805439  |
| O | -2.5108126608 | 1.1658547399   | -0.0424010425 |
| C | -3.6741993235 | 0.3474990446   | -0.0605901911 |
| O | 2.5108126608  | -1.1658547399  | -0.0424010425 |
| C | 3.6741993235  | -0.3474990446  | -0.0605901911 |
| C | 0.0060847321  | 5.3391825231   | -0.0038841157 |
| C | -1.2377149678 | 5.6968623959   | -0.5643468680 |
| C | -1.6647433924 | 7.0179512389   | -0.6061229269 |
| C | -0.8609644585 | 8.0569230105   | -0.0926550492 |
| C | 0.3898692214  | 7.7112563600   | 0.4531240208  |
| C | 0.8098831147  | 6.3860467612   | 0.4905229471  |
| N | -1.2612736621 | 9.3849214261   | -0.1907367037 |
| H | -1.4453873521 | 3.1121902916   | -0.1338152723 |
| H | -1.8825821281 | 4.9308977776   | -0.9978820132 |
| H | -2.6303146336 | 7.2587023689   | -1.0590327368 |
| H | -2.2632774419 | 9.5352653285   | -0.2518445037 |
| H | -0.8230563040 | 10.0214866321  | 0.4673678420  |
| H | 1.0402286681  | 8.4947497353   | 0.8511043207  |
| H | 1.7847421885  | 6.1559842170   | 0.9245632988  |
| H | -2.0011301267 | -1.4567505860  | -0.0581902782 |
| H | 2.0011301267  | 1.4567505860   | -0.0581902782 |
| H | 1.4453873521  | -3.1121902916  | -0.1338152723 |
| H | 1.8825821281  | -4.9308977776  | -0.9978820132 |
| H | 2.6303146336  | -7.2587023689  | -1.0590327368 |
| H | 2.2632774419  | -9.5352653285  | -0.2518445037 |
| H | 0.8230563040  | -10.0214866321 | 0.4673678420  |
| H | -1.0402286681 | -8.4947497353  | 0.8511043207  |
| H | -1.7847421885 | -6.1559842170  | 0.9245632988  |
| H | 4.5260747665  | -1.0391973546  | -0.0392572903 |
| H | 3.7239624075  | 0.2668687591   | -0.9762761892 |
| H | 3.7190498809  | 0.3184642791   | 0.8178214872  |
| H | -4.5260747665 | 1.0391973546   | -0.0392572903 |
| H | -3.7239624075 | -0.2668687591  | -0.9762761892 |
| H | -3.7190498809 | -0.3184642791  | 0.8178214872  |

BPyMCSA (geometry optimized at B3LYP/cc-pVDZ level of theory)

|   |               |                |               |
|---|---------------|----------------|---------------|
| C | -0.0025726741 | 2.8448615537   | -0.3799601977 |
| C | 1.0353081191  | 3.8399431875   | -0.3763400239 |
| C | 0.7685030655  | 5.2260787367   | -0.3838499015 |
| C | -0.5641255767 | 5.7899895944   | -0.4051713605 |
| C | -0.7727798651 | 7.1356073357   | -0.4079555571 |
| N | 0.2604399963  | 8.0457977476   | -0.4016754682 |
| C | 1.5509756209  | 7.5539218679   | -0.3794333081 |
| C | 1.8183720194  | 6.2195912649   | -0.3763439456 |
| C | 2.4225912313  | 3.4857778981   | -0.3631024649 |
| N | 3.5678891247  | 3.2531080820   | -0.3523265960 |
| C | 0.0025726741  | 9.4822083809   | -0.3025831296 |
| H | -1.0134194446 | 3.2458642016   | -0.3803503812 |
| H | -1.4416081113 | 5.1473530960   | -0.4269434149 |
| H | -1.7759940902 | 7.5629614318   | -0.4255352505 |
| C | -0.0373967590 | 9.9989214575   | 1.1396062220  |
| H | 2.3418685922  | 8.3042324454   | -0.3730557501 |
| H | 2.8605262575  | 5.9009566797   | -0.3715895355 |
| C | -0.3384279793 | 11.4965881630  | 1.2205596353  |
| N | -0.2615352307 | 11.9507481541  | 2.6102733326  |
| H | -0.4086476229 | 12.9612172240  | 2.6508611294  |
| H | -1.0345099822 | 11.5456152145  | 3.1448042028  |
| H | 0.7859417830  | 10.0057608613  | -0.8745462468 |
| H | -0.9522534754 | 9.6861575643   | -0.8129134162 |
| H | 0.9258495434  | 9.8024214488   | 1.6390565802  |
| H | -0.8038935589 | 9.4346029640   | 1.7018710211  |
| H | 0.4232704361  | 12.0513260619  | 0.6434029481  |
| H | -1.3131569740 | 11.6994933327  | 0.7220111115  |
| C | 0.0446380810  | 1.4591949773   | -0.3807732541 |
| C | -1.2125820084 | 0.7129670550   | -0.3813216383 |
| C | -1.2435612806 | -0.6528985199  | -0.3814844323 |
| C | -0.0446380810 | -1.4591949773  | -0.3807732541 |
| C | 1.2125820084  | -0.7129670550  | -0.3813216383 |
| C | 1.2435612806  | 0.6528985199   | -0.3814844323 |
| O | -2.3381669553 | 1.4916120716   | -0.3816853207 |
| H | -2.1993002716 | -1.1645741734  | -0.3820971195 |
| C | 0.0025726741  | -2.8448615537  | -0.3799601977 |
| O | 2.3381669553  | -1.4916120716  | -0.3816853207 |
| H | 2.1993002716  | 1.1645741734   | -0.3820971195 |
| C | -1.0353081191 | -3.8399431875  | -0.3763400239 |
| C | -0.7685030655 | -5.2260787367  | -0.3838499015 |
| C | 0.5641255767  | -5.7899895944  | -0.4051713605 |
| C | 0.7727798651  | -7.1356073357  | -0.4079555571 |
| N | -0.2604399963 | -8.0457977476  | -0.4016754682 |
| C | -1.5509756209 | -7.5539218679  | -0.3794333081 |
| C | -1.8183720194 | -6.2195912649  | -0.3763439456 |
| C | -2.4225912313 | -3.4857778981  | -0.3631024649 |
| N | -3.5678891247 | -3.2531080820  | -0.3523265960 |
| C | -0.0025726741 | -9.4822083809  | -0.3025831296 |
| H | 1.0134194446  | -3.2458642016  | -0.3803503812 |
| H | 1.4416081113  | -5.1473530960  | -0.4269434149 |
| H | 1.7759940902  | -7.5629614318  | -0.4255352505 |
| C | 0.0373967590  | -9.9989214575  | 1.1396062220  |
| H | -2.3418685922 | -8.3042324454  | -0.3730557501 |
| H | -2.8605262575 | -5.9009566797  | -0.3715895355 |
| C | 0.3384279793  | -11.4965881630 | 1.2205596353  |
| N | 0.2615352307  | -11.9507481541 | 2.6102733326  |

|   |               |                |               |
|---|---------------|----------------|---------------|
| H | 0.4086476229  | -12.9612172240 | 2.6508611294  |
| H | 1.0345099822  | -11.5456152145 | 3.1448042028  |
| H | -0.7859417830 | -10.0057608613 | -0.8745462468 |
| H | 0.9522534754  | -9.6861575643  | -0.8129134162 |
| H | -0.9258495434 | -9.8024214488  | 1.6390565802  |
| H | 0.8038935589  | -9.4346029640  | 1.7018710211  |
| H | -0.4232704361 | -12.0513260619 | 0.6434029481  |
| H | 1.3131569740  | -11.6994933327 | 0.7220111115  |
| C | 3.6005437296  | -0.8434075493  | -0.3828191151 |
| H | 4.3521468382  | -1.6442816178  | -0.3818976488 |
| H | 3.7348851332  | -0.2135768362  | -1.2794859837 |
| H | 3.7353599268  | -0.2108631726  | 0.5118262436  |
| C | -3.6005437296 | 0.8434075493   | -0.3828191151 |
| H | -4.3521468382 | 1.6442816178   | -0.3818976488 |
| H | -3.7348851332 | 0.2135768362   | -1.2794859837 |
| H | -3.7353599268 | 0.2108631726   | 0.5118262436  |

BPCSA+ (geometry optimized at B3LYP/cc-pVDZ level of theory)

|   |                |               |               |
|---|----------------|---------------|---------------|
| C | 2.4246535937   | 1.3476316098  | -0.3531165465 |
| C | 1.7108216144   | 0.1548962313  | -0.0800943264 |
| C | 2.4712014817   | -1.0041055658 | 0.1752302525  |
| C | 3.8676973522   | -0.9966357162 | 0.1747897633  |
| C | 4.5398613781   | 0.1994870262  | -0.0924222858 |
| C | 3.8121618444   | 1.3672729163  | -0.3584875385 |
| C | 0.2554112390   | 0.0191367001  | -0.0452809545 |
| C | -0.7491225481  | 0.9376014474  | -0.1505741378 |
| C | -0.4694276214  | 2.3421138658  | -0.2790186139 |
| N | -0.2686695581  | 3.4857217418  | -0.3789929295 |
| O | 5.9136909059   | 0.3372930371  | -0.1212615384 |
| C | 6.7110534867   | -0.7892042663 | 0.1534460106  |
| C | 8.1546937920   | -0.2868825651 | 0.0587339570  |
| C | 9.1663621892   | -1.3886684082 | 0.3319851299  |
| N | 10.5819698609  | -0.8379375715 | 0.2277570518  |
| C | -2.1897406112  | 0.5741262533  | -0.1155048523 |
| C | -3.1573669491  | 1.5218707790  | 0.2676409784  |
| C | -4.5073906517  | 1.1857722663  | 0.3312010120  |
| C | -4.9567620917  | -0.1069780755 | 0.0051907278  |
| C | -3.9875739613  | -1.0469642102 | -0.3973874050 |
| C | -2.6378646959  | -0.7155368030 | -0.4610895132 |
| C | -6.3966187693  | -0.4637964779 | 0.0708503974  |
| C | -7.2221079655  | 0.0518491676  | 1.0880674627  |
| C | -8.5754049678  | -0.2841261085 | 1.1521484575  |
| C | -9.1346189121  | -1.1405579420 | 0.1990492993  |
| C | -8.3278243825  | -1.6590673265 | -0.8182060932 |
| C | -6.9737577449  | -1.3257810573 | -0.8809375115 |
| H | -6.7931765509  | 0.7019780340  | 1.8534864093  |
| H | -9.1950020536  | 0.1202440915  | 1.9556855732  |
| H | -10.1938289603 | -1.4018523134 | 0.2482914306  |
| H | -8.7569968373  | -2.3209797081 | -1.5737413272 |
| H | -6.3620811720  | -1.7163903526 | -1.6969441485 |
| H | -5.2304146031  | 1.9523494655  | 0.6155245644  |
| H | -2.8489583114  | 2.5383050785  | 0.5193461296  |
| H | -1.9281811061  | -1.4700749718 | -0.8051536516 |
| H | -4.2968036228  | -2.0615027799 | -0.6555631441 |
| H | 1.9541596907   | -1.9435972448 | 0.3838682084  |
| H | 4.4018373245   | -1.9243986374 | 0.3815963427  |
| H | 4.3558751457   | 2.2894567063  | -0.5696690149 |
| H | 1.8939594329   | 2.2732001866  | -0.5648727114 |
| H | -0.0768753372  | -1.0098126415 | 0.1134373458  |
| H | 11.2965697080  | -1.5573183495 | 0.4072421722  |
| H | 10.7633291571  | -0.4481975127 | -0.7090036817 |
| H | 6.5042439946   | -1.1933256519 | 1.1635444898  |
| H | 6.5313934314   | -1.5999247457 | -0.5793352145 |
| H | 8.2784403481   | 0.5374449697  | 0.7824002222  |
| H | 8.3060001089   | 0.1331044397  | -0.9508438954 |
| H | 9.0792743314   | -1.8068892814 | 1.3453358486  |
| H | 9.1085785778   | -2.2118805179 | -0.3948884810 |
| H | 10.7360113361  | -0.0734942451 | 0.9017179672  |

NCSA+ (geometry optimized at B3LYP/cc-pVDZ level of theory)

|   |               |               |               |
|---|---------------|---------------|---------------|
| C | -3.5647694927 | -0.9708109687 | -0.4946522021 |
| C | -3.1839635016 | 0.3152660537  | -0.0600240244 |
| C | -4.1837441762 | 1.1914332877  | 0.4070860517  |
| C | -5.5163137992 | 0.7906573922  | 0.4702788993  |
| C | -5.8522023132 | -0.4955148128 | 0.0524914244  |
| C | -4.8924131797 | -1.3824142692 | -0.4357367129 |
| C | -1.7618383987 | 0.7532519984  | -0.0916542687 |
| C | -1.5525242950 | 2.1731460796  | -0.1521092783 |
| N | -1.4109165475 | 3.3289621638  | -0.1962264865 |
| N | -7.2649921692 | -0.9296571534 | 0.1152606661  |
| O | -7.5202311129 | -2.0666726561 | -0.2625414527 |
| C | -0.7186048719 | -0.1251058330 | -0.0356838503 |
| C | 0.7282425859  | 0.0758759664  | -0.0666763799 |
| C | 1.3859382719  | 1.3122599975  | -0.2797912211 |
| C | 2.7706263203  | 1.3928769387  | -0.2887037993 |
| C | 3.5501091091  | 0.2450722297  | -0.0852788094 |
| C | 2.9325383592  | -0.9922818049 | 0.1223802100  |
| C | 1.5382961592  | -1.0612211809 | 0.1266268021  |
| O | 4.9133750109  | 0.4445101303  | -0.1114073437 |
| C | 5.7653988353  | -0.6579161200 | 0.0991288539  |
| C | 7.1835383554  | -0.0849470920 | 0.0226154111  |
| C | 8.2469234001  | -1.1522170336 | 0.2314847925  |
| N | 9.6353247485  | -0.5336199710 | 0.1481076153  |
| O | -8.0820717341 | -0.1245441209 | 0.5426904123  |
| H | -6.2968929956 | 1.4551118353  | 0.8376663523  |
| H | -3.9143017457 | 2.1973011936  | 0.7326638880  |
| H | -2.8230861602 | -1.6524049378 | -0.9129198179 |
| H | -5.2025098717 | -2.3700681865 | -0.7734956937 |
| H | 1.0637727994  | -2.0318730472 | 0.2881607841  |
| H | 3.5082551605  | -1.9045856605 | 0.2795101015  |
| H | 3.2729455122  | 2.3472359467  | -0.4537309035 |
| H | 0.8137879292  | 2.2231414618  | -0.4417713075 |
| H | -1.0046780192 | -1.1742335361 | 0.0739361377  |
| H | 10.3822495972 | -1.2291919815 | 0.2855635575  |
| H | 9.7925992848  | -0.0880912635 | -0.7679756610 |
| H | 5.5844756340  | -1.1223697984 | 1.0876530376  |
| H | 5.6158310771  | -1.4353562371 | -0.6747834425 |
| H | 7.2756049240  | 0.7050596816  | 0.7880091249  |
| H | 7.3072603047  | 0.3938765746  | -0.9642191405 |
| H | 8.1870144543  | -1.6265303101 | 1.2218494519  |
| H | 8.2200789810  | -1.9381279973 | -0.5372746381 |
| H | 9.7616795662  | 0.2004991633  | 0.8605413073  |

BMCSA+ (geometry optimized at B3LYP/cc-pVDZ level of theory)

|   |                |               |               |
|---|----------------|---------------|---------------|
| C | 6.3077682223   | 1.1952117665  | -0.4341730435 |
| C | 5.3201277513   | 0.2820455599  | -0.0090597975 |
| C | 5.7451738410   | -0.9847755796 | 0.4499586695  |
| C | 7.0919260853   | -1.3352376816 | 0.4675104955  |
| C | 8.0301303450   | -0.4020428029 | 0.0271246825  |
| C | 7.6614027337   | 0.8609959658  | -0.4216765617 |
| C | 3.8862647094   | 0.6703265744  | -0.0417836102 |
| C | 3.6442787073   | 2.0718026005  | -0.2312788923 |
| N | 3.4953565136   | 3.2166721196  | -0.3912632599 |
| N | 9.4751067698   | -0.7673109827 | 0.0517547131  |
| C | 2.8670617601   | -0.2398960537 | 0.0670994931  |
| C | 1.4254311852   | -0.0745626078 | 0.0683682023  |
| C | 0.6281486054   | -1.2627879133 | 0.0731190251  |
| C | -0.7615781678  | -1.1700110353 | 0.0749858734  |
| C | -1.4254298781  | 0.0745597514  | 0.0683680166  |
| C | -0.6281472137  | 1.2627849975  | 0.0731271776  |
| C | 0.7615795649   | 1.1700080031  | 0.0749942043  |
| C | -2.8670603525  | 0.2398941556  | 0.0670990523  |
| C | -3.8862651433  | -0.6703269978 | -0.0417811018 |
| C | -3.6442817924  | -2.0718047013 | -0.2312689152 |
| N | -3.4953611863  | -3.2166754005 | -0.3912462421 |
| O | 1.2976156902   | -2.4414659770 | 0.0720510709  |
| C | 0.5532102648   | -3.6641544658 | 0.0825745561  |
| O | -1.2976142456  | 2.4414631776  | 0.0720671230  |
| C | -0.5532090583  | 3.6641517511  | 0.0826013764  |
| C | -5.3201279101  | -0.2820439290 | -0.0090595738 |
| C | -6.3077706036  | -1.1952185346 | -0.4341501327 |
| C | -7.6614049563  | -0.8610020725 | -0.4216552179 |
| C | -8.0301304508  | 0.4020461923  | 0.0271208229  |
| C | -7.0919240745  | 1.3352500167  | 0.4674831423  |
| C | -5.7451719889  | 0.9847872479  | 0.4499334188  |
| N | -9.4751066110  | 0.7673152320  | 0.0517492449  |
| H | 3.1659134469   | -1.2847454390 | 0.1455608876  |
| H | 5.0226697480   | -1.7105104794 | 0.8214266657  |
| H | 7.3915661192   | -2.3202020346 | 0.8336032821  |
| H | 9.6800060379   | -1.5875582871 | -0.5399629113 |
| H | 10.0593679415  | 0.0066206923  | -0.2945056242 |
| H | 8.4018312971   | 1.5896072189  | -0.7620559355 |
| H | 6.0165077625   | 2.1860235223  | -0.7840346389 |
| H | -1.3488073411  | -2.0812962778 | 0.0829711491  |
| H | 1.3488087804   | 2.0812931239  | 0.0829867127  |
| H | -3.1659102824  | 1.2847441478  | 0.1455588994  |
| H | -5.0226666311  | 1.7105307469  | 0.8213820191  |
| H | -7.3915622033  | 2.3202225402  | 0.8335555027  |
| H | -9.6800065671  | 1.5875556676  | -0.5399775960 |
| H | -10.0593686824 | -0.0066202196 | -0.2945010696 |
| H | -8.4018350543  | -1.5896203636 | -0.7620162260 |
| H | -6.0165119430  | -2.1860377625 | -0.7839922677 |
| H | -1.3011601509  | 4.4654674232  | 0.0656682740  |
| H | 0.0583116916   | 3.7498112326  | 0.9957451639  |
| H | 0.0947063887   | 3.7451401959  | -0.8050801171 |
| H | 1.3011612146   | -4.4654701379 | 0.0656362805  |
| H | -0.0583121160  | -3.7498210700 | 0.9957165671  |
| H | -0.0947036471  | -3.7451356344 | -0.8051086927 |
| H | -9.8045861011  | 0.9903739146  | 1.0040106261  |
| H | 9.8045879003   | -0.9903583727 | 1.0040181405  |

BPyMCSA+ (geometry optimized at B3LYP/cc-pVDZ level of theory)

|   |                |               |               |
|---|----------------|---------------|---------------|
| C | -6.2445087380  | 1.6649578256  | -0.3432199155 |
| C | -5.2311322203  | 0.6304150132  | -0.3581215066 |
| C | -5.7598008283  | -0.7047238446 | -0.5627103187 |
| C | -7.0907675577  | -0.9372913178 | -0.6968608639 |
| N | -8.0289862638  | 0.0861811491  | -0.6665506305 |
| C | -7.5650082363  | 1.3871039117  | -0.4858195465 |
| C | -3.8612973295  | 0.9164022168  | -0.2080471095 |
| C | -3.5442832966  | 2.3044522020  | -0.0321942007 |
| N | -3.3447499595  | 3.4448147506  | 0.1164685184  |
| C | -9.4440487772  | -0.1990495909 | -0.6366171871 |
| C | -9.9891412043  | -0.3597195980 | 0.8081740681  |
| C | -11.4871528275 | -0.6286107941 | 0.8125603598  |
| N | -12.0179087856 | -0.7595827200 | 2.2354373971  |
| C | -2.8408909148  | -0.0933485153 | -0.2108051467 |
| C | -1.4559959581  | 0.0007388878  | -0.1827399227 |
| C | -0.6921365232  | 1.2236138081  | -0.1776500867 |
| C | 0.6752287663   | 1.2366177824  | -0.1771638020 |
| C | 1.4559963233   | -0.0007370235 | -0.1827392464 |
| C | 0.6921368513   | -1.2236118819 | -0.1776554409 |
| C | -0.6752283482  | -1.2366159567 | -0.1771698092 |
| C | 2.8408910312   | 0.0933501181  | -0.2108035264 |
| C | 3.8612966892   | -0.9164010420 | -0.2080493394 |
| C | 3.5442823335   | -2.3044512389 | -0.0322004269 |
| N | 3.3447489593   | -3.4448141421 | 0.1164590880  |
| O | 1.4179113018   | 2.3788831570  | -0.1765580285 |
| C | 0.7369334750   | 3.6289059083  | -0.1954083907 |
| O | -1.4179110955  | -2.3788815271 | -0.1765695989 |
| C | -0.7369331098  | -3.6289042202 | -0.1954252948 |
| C | 5.2311314847   | -0.6304141612 | -0.3581234122 |
| C | 5.7598003520   | 0.7047248447  | -0.5627090539 |
| C | 7.0907669756   | 0.9372922809  | -0.6968594192 |
| N | 8.0289853113   | -0.0861804760 | -0.6665520539 |
| C | 7.5650069663   | -1.3871034248 | -0.4858241440 |
| C | 6.2445075209   | -1.6649572117 | -0.3432248533 |
| C | 9.4440478776   | 0.1990496623  | -0.6366196583 |
| C | 9.9891422097   | 0.3597164034  | 0.8081712052  |
| C | 11.4871539388  | 0.6286070475  | 0.8125561475  |
| N | 12.0179117490  | 0.7595759147  | 2.2354327350  |
| H | 3.2096669458   | 1.1160824059  | -0.2433517751 |
| H | 5.0930920903   | 1.5614041479  | -0.6378182235 |
| H | 7.4888174603   | 1.9385818514  | -0.8677365457 |
| H | 8.3258255214   | -2.1685348611 | -0.4981101354 |
| H | 5.9467064308   | -2.7074440695 | -0.2308993252 |
| H | 13.0329002040  | 0.9415146970  | 2.2586258578  |
| H | 11.5563857700  | 1.5303415515  | 2.7409059130  |
| H | 9.9820938868   | -0.6173976295 | -1.1457649399 |
| H | 9.6321931307   | 1.1198288853  | -1.2111856579 |
| H | 9.7667073847   | -0.5632398875 | 1.3719235903  |
| H | 9.4501806711   | 1.1873180194  | 1.3015387613  |
| H | 12.0635274067  | -0.1875806379 | 0.3525358385  |
| H | 11.7504655867  | 1.5693089283  | 0.3069356116  |
| H | -1.2312009339  | 2.1638325977  | -0.1819448403 |
| H | 1.2312010821   | -2.1638306345 | -0.1819543750 |
| H | -3.2096665172  | -1.1160810723 | -0.2433580173 |
| H | -5.0930921908  | -1.5614029096 | -0.6378217267 |
| H | -7.4888178307  | -1.9385806978 | -0.8677403346 |



|   |                |               |               |
|---|----------------|---------------|---------------|
| H | -8.3258271090  | 2.1685352262  | -0.4981034201 |
| H | -5.9467078067  | 2.7074446304  | -0.2308918855 |
| H | -13.0328971348 | -0.9415219414 | 2.2586314882  |
| H | -11.5563818011 | -1.5303492193 | 2.7409084319  |
| H | -9.9820956860  | 0.6173986402  | -1.1457601191 |
| H | -9.6321943478  | -1.1198277105 | -1.2111849594 |
| H | -9.7667059559  | 0.5632356435  | 1.3719281200  |
| H | -9.4501787131  | -1.1873221047 | 1.3015391847  |
| H | -12.0635271950 | 0.1875776470  | 0.3525424257  |
| H | -11.7504647929 | -1.5693117912 | 0.3069382517  |
| H | -1.5196668671  | -4.3980993489 | -0.1867515119 |
| H | -0.1221893225  | -3.7388023463 | -1.1049491206 |
| H | -0.0894758768  | -3.7506126873 | 0.6893574486  |
| H | 1.5196672057   | 4.3981009418  | -0.1867309460 |
| H | 0.1221899464   | 3.7388081408  | -1.1049318747 |
| H | 0.0894759742   | 3.7506105230  | 0.6893746680  |
| H | -11.8473865096 | 0.0979503869  | 2.7816324813  |
| H | 11.8473898963  | -0.0979581917 | 2.7816263164  |

## References

- (1) Lebahers, T.; Adamo, C.; Ciofini, I. "A qualitative index of spatial extent in charge-transfer excitations", *J. Chem. Theory Comput.* 2011, 7, 2498–2506.
- (2) Nguyen, K. A.; Rogers, J. E.; Slagle, J. E.; Day, P. N.; Kannan, R.; Tan, L.-S.; Fleitz, P. A.; Pachter, R. "Effects of conjugation in length and dimension on spectroscopic properties of fluorene-based chromophores from experiment and theory", *J. Phys. Chem. A* 2006, 110, 13172.
- (3) Day, P. N.; Nguyen, K. A.; Pachter, R. "Calculation of two-photon absorption spectra of donor-acceptor compounds in solution using quadratic response time-dependent density functional theory", *J. Chem. Phys.* 2006, 125, 094103.
- (4) Day, P. N.; Nguyen, K. A.; Pachter, R. "Calculation of one- and two-photon absorption spectra of thiolated gold nanoclusters using time-dependent density functional theory", *J. Chem. Theory Comput.* 2010, 6, 2809-2821.
